# Supplementary material for: The Role of Epigenetics in Placental Development and the Etiology of Preeclampsia
Source: PubMed Central journal article supplement (PMC6600551; doi:10.3390/ijms20112837), 2019-06-11
Supplement: ijms-20-02837-s001.pdf [file ijms-20-02837-s001.pdf]

Table 1. High-throughput studies analyzing methylation profiles of different relevant tissues in the context of preeclampsia [42,43,47,54–73].

| Sample                                                                                                                   | Method                                               | GEO ID    | Findings                                                                                                                                                                                                                                    | Reference |
|--------------------------------------------------------------------------------------------------------------------------|------------------------------------------------------|-----------|---------------------------------------------------------------------------------------------------------------------------------------------------------------------------------------------------------------------------------------------|-----------|
| First-trimester placenta and maternal blood (three of each)<br>Term placenta and maternal blood (two of each)            | Illumina<br>HM450                                    |           | Identified 2944 and 5218 hypermethylated CpG sites in the first and third trimester placenta, respectively that were fetal-specific and found an overlap of 2613 differentially methylated sites between maternal blood and placenta tissue | [54]      |
| First-trimester placenta and maternal blood (14 of each)                                                                 | MeDIP-Seq and<br>Illumina<br>HM450                   |           | Using both assays, 3759 CpG sites in 2188 regions were differentially methylated between maternal blood and placenta                                                                                                                        | [55]      |
| Placenta (five first, ten second, 21 third trimester) for 450K<br>Three term placentas for MethylC-Seq                   | Illumina<br>HM450<br>and<br>MethylC-Seq &<br>RNA-Seq | GSE39777  | Identified partially methylated domains (PMDs) cover 37% of the placental genome. RNA-seq revealed that genes with PMDs are repressed. 450K data showed that PMDs are conserved throughout gestation                                        | [42]      |
| Placenta (18 first, ten second, 14 third trimester)                                                                      | Illumina<br>HM27                                     |           | An increase in overall genome methylation observed from first to third trimester. First-, second- and third-trimester cluster separately on a dendrogram                                                                                    | [56]      |
| Term placenta (3)                                                                                                        | MeDIP +<br>custom<br>microarray                      |           | Identified tissue-specific differentially methylated regions in the placenta                                                                                                                                                                | [57]      |
| side-population trophoblasts, cytotrophoblasts, extravillous trophoblasts 12                                             | Illumina<br>HiSeq 2000                               | GSE109682 | Human trophoblasts are primarily distinguished from somatic cells by differences in the pattern rather than the degree of global CpG methylation                                                                                            | [47]      |
| Placental DNA methylation profiles of E18.5 term placenta from three wild type control and three Hltf null mouse samples | Illumina<br>HiSeq 2000<br>(Mus musculus)             | GSE114145 | Hltf-gene deletion alters the epigenetic landscape of the placenta.                                                                                                                                                                         | [58]      |
| Fetal placental tissue of both sexes in GR+/+ vs. GR+/- c57/bl6 mice                                                     | Illumina<br>HiSeq 2000                               | GSE123188 | GR mutation in mice changes the genome-wide epigenome of placental tissue in a highly sex-specific manner                                                                                                                                   | [59]      |

|                                                                                                                                                                                                                        |                                       |           |                                                                                                                                |                         |
|------------------------------------------------------------------------------------------------------------------------------------------------------------------------------------------------------------------------|---------------------------------------|-----------|--------------------------------------------------------------------------------------------------------------------------------|-------------------------|
| 30 human placentas                                                                                                                                                                                                     | Illumina HumanMethylation450 BeadChip | GSE108567 | Adjusting for batch effects in DNA methylation microarray data, a lesson learned                                               | [60]                    |
| comprehensive epigenetic mechanism of mouse embryo development and the corresponding lineage development process,                                                                                                      | Illumina HiSeq 2500 (Mus musculus)    | GSE104243 | Distinct distribution of H3K27me3 and DNA methylation stabilizes the segregation of extraembryonic and embryonic lineages      | [61]                    |
| 67 samples from different normal human tissues                                                                                                                                                                         | Illumina HumanMethylation450 BeadChip | GSE103413 | Mining novel candidate imprinted genes using genome-wide methylation screening and literature review                           | Database, not published |
| Bisulphite and oxidative bisulphite converted DNA from 4 human placenta                                                                                                                                                | Illumina HumanMethylation450 BeadChip | GSE93429  | Comparison of ox-BS-450k 5-hydroxymethylcytosine and BS-450k 5-methylcytosine profiles in the human placenta                   | [62]                    |
| DNA methylation comparison in human placenta between 6 first trimester and 5 third trimester samples                                                                                                                   | Illumina Genome Analyzer Ix           | GSE98752  | A Complex Association between DNA Methylation and Gene Expression in Human Placenta at First and Third Trimesters              | [63]                    |
| DNA Methylation Barcodes in Human Fetal Tissues and Human Induced Pluripotent Stem Cells                                                                                                                               | Illumina HumanMethylation450 BeadChip | GSE76641  | DNA methylation and transcriptional trajectories during human development and reprogramming of isogenic pluripotent stem cells | [64]                    |
| DNA methylation profiling of amnion, basal plate, chorion, trophoblast, and villi in 2nd trimester and at term                                                                                                         | Illumina HumanMethylation450 BeadChip | GSE98938  | Genome-scale fluctuations in the cytotrophoblast epigenome over gestation and in placental pathologies                         | Database, not published |
| villous cytotrophoblasts samples isolated ex vivo from placental chorionic villi before they first come into contact with maternal blood (8-10 weeks of gestation, n = 9) and after (12-14 weeks of gestation, n = 10) | Illumina HiSeq 2000                   | GSE84350  | DNA Methylation Divergence and Tissue Specialization in the Developing Mouse Placenta                                          | [65]                    |
| 23 placental tissue collected at term.                                                                                                                                                                                 | Illumina HumanMethylation450 BeadChip | GSE93208  | DNA methylation profiling of first trimester villous cytotrophoblasts                                                          | [43]                    |
|                                                                                                                                                                                                                        | Illumina HumanMethylation450 BeadChip | GSE71719  | DNA methylation and hydroxymethylation assessment                                                                              | [66]                    |

|                                                                                                                                                                                                                                                                                                                                                                                                                                                                                                                                                   |                                               |          |                                                                                                                                                                                                  |                               |
|---------------------------------------------------------------------------------------------------------------------------------------------------------------------------------------------------------------------------------------------------------------------------------------------------------------------------------------------------------------------------------------------------------------------------------------------------------------------------------------------------------------------------------------------------|-----------------------------------------------|----------|--------------------------------------------------------------------------------------------------------------------------------------------------------------------------------------------------|-------------------------------|
|                                                                                                                                                                                                                                                                                                                                                                                                                                                                                                                                                   | ylation450<br>BeadChip                        |          | through 450K analysis of paired<br>bisulfite and oxidative-bisulfite<br>conversion.                                                                                                              |                               |
| DNA from 6 chorionic<br>villus samples from<br>the 1st trimester (from<br>3 male and 3 female<br>fetuses) as well as 3<br>maternal blood cell<br>samples<br>We sought to compare<br>genome-wide<br>methylation patterns<br>of human placenta<br>with blood<br>neutrophils, a<br>homogenous somatic<br>tissue (11)<br>mRNA and DNA<br>methylation profiling<br>of Dnmt3a/3b-null<br>trophoblast<br>151 assays for<br>imprinted<br>differentially<br>methylated regions in<br>human placental<br>villous, trophoblast<br>and whole blood<br>samples | llumina<br>HiSeq 2000<br>(Homo<br>sapiens)    | GSE58826 | DNA Methylation Predictors of<br>Gene Expression in the 1st<br>Trimester Chorionic Villus                                                                                                        | Database,<br>not<br>published |
|                                                                                                                                                                                                                                                                                                                                                                                                                                                                                                                                                   | llumina<br>HiSeq 2000<br>(Homo<br>sapiens)    | GSE59988 | The human placenta exhibits<br>dichotomised DNA methylation<br>pattern compared to<br>homogenous somatic tissue                                                                                  | [67]                          |
|                                                                                                                                                                                                                                                                                                                                                                                                                                                                                                                                                   | llumina<br>HiSeq 2000<br>(Mus<br>musculus)    | GSE66049 | Maternal DNA methylation<br>regulates early trophoblast<br>development                                                                                                                           | [68]                          |
|                                                                                                                                                                                                                                                                                                                                                                                                                                                                                                                                                   | llumina<br>MiSeq<br>(Homo<br>sapiens)         | GSE76273 | Pervasive polymorphic<br>imprinted methylation in the<br>human placenta                                                                                                                          | [69]                          |
| 17 samples of placental<br>villous explant culture<br>exposed to different<br>growth conditions                                                                                                                                                                                                                                                                                                                                                                                                                                                   | llumina<br>HumanMet<br>ylation450<br>BeadChip | GSE60885 | Genome-wide DNA<br>methylation identifies<br>trophoblast invasion-related<br>genes: Claudin-4 and<br>Fucosyltransferase IV control<br>mobility via altering matrix<br>metalloproteinase activity | [70]                          |
| Bisulphite converted<br>DNA from 3 replicates<br>of untransduced,<br>scrambled control and<br>NLRP7 knockdown in<br>the undifferentiated<br>and BMP<br>differentiated groups                                                                                                                                                                                                                                                                                                                                                                      | llumina<br>HumanMet<br>ylation450<br>BeadChip | GSE45727 | NLRP7 promotes trophoblast<br>lineage differentiation, YY1<br>binding and alters CpG<br>methylation                                                                                              | [71]                          |
| Bisulphite converted<br>DNA from the 48<br>samples                                                                                                                                                                                                                                                                                                                                                                                                                                                                                                | llumina<br>HumanMet<br>ylation27<br>BeadChip  | GSE36829 | Epigenome analysis of placenta<br>samples from newborns                                                                                                                                          | Database,<br>not<br>published |
| 42 samples, with 18<br>first trimester, 10                                                                                                                                                                                                                                                                                                                                                                                                                                                                                                        | llumina<br>HumanMet                           | GSE31781 | Evidence for widespread<br>changes in promoter                                                                                                                                                   | [72]                          |

|                                                                                     |                                                |          |                                                                                                                                   |      |
|-------------------------------------------------------------------------------------|------------------------------------------------|----------|-----------------------------------------------------------------------------------------------------------------------------------|------|
| second trimester, 14<br>full term placenta                                          | hylation27<br>BeadChip                         |          | methylation profile in human<br>placenta in response to<br>increasing gestational age and<br>environmental/stochastic<br>factors. |      |
| 12 human chorionic<br>villus samples and 12<br>human maternal blood<br>cell samples | Illumina<br>HumanMet<br>hylation27<br>BeadChip | GSE23311 | DNA Methylation Analysis in<br>Human Chorionic Villus and<br>Maternal Blood Cells                                                 | [73] |
